# Supplementary material for: [Retracted] Dietary Quercetin Supplementation Attenuates Diarrhea and Intestinal Damage by Regulating Gut Microbiota in Weanling Piglets
Source: Hindawi journal article supplement (doi:10.1155/2021/6221012), 2021-01-01
Supplement: f3 [file 6221012.f3.docx]

**Supplementary Tables**

**TABLE S1. Ingredients and nutrients composition of the basal diet offered to piglets**

| Ingredients (%) | Postnatal d21-35 | |
| --- | --- | --- |
| Corn |  | 51.49 | |
| Soybean meal |  | 11 | |
| Whey powder |  | 5.0 | |
| Puffed rice noodles |  | 5.0 | |
| Soy protein concentrate |  | 4.0 | |
| Expanded soybeans |  | 5.0 | |
| Fermented soybean meal |  | 4.0 | |
| Soybean oil |  | 2.5 | |
| Fish meal |  | 3.0 | |
| ZnO |  | 0.35 | |
| Stone powder |  | 0.8 | |
| Sugar |  | 1.5 | |
| Glucose |  | 2.5 | |
| Acidifiers |  | 0.35 | |
| Yeast nucleic acid |  | 0.5 | |
| Tryptophane |  | 0.04 | |
| CaHPO4 |  | 1.1 | |
| Salt |  | 0.25 | |
| DL-Met |  | 0.08 | |
| L-Lys |  | 0.42 | |
| L-Thr |  | 0.12 | |
| Vitamin premix1 |  | 0.50 | |
| Mineral premix2 |  | 0.50 | |
| Total |  | 100.00 | |
| Nutrient levels |  |  | |
| Crude protein (%) |  | 18.36 | |
| Digestible energy (Mcal/kg) |  | 13.03 | |
| Total Lys (%) |  | 1.32 | |
| Total Met (%) |  | 0.38 | |
| Total Met + Cys (%) |  | 0.82 | |
| Calcium (%) |  | 0.88 | |
| Total phosphorus (%) |  | 0.68 | |

1Vitamin premix provided per kg of diet: retinyl acetate, 10000 IU; cholecalciferol 2600 IU; dl-α-tocopheryl acetate, 55 IU; menadione, 6.0 mg; thiamin, 3.0 mg; riboflavin, 5.0 mg; pantothenic acid, 12.0 mg; pyridoxine, 10.0 mg; niacin, 30.0 mg; *d*-biotin, 0.2 mg; folic acid, 1.5 mg; cyanocobalamin, 0.05 mg; choline chloride 1600 mg.

2Mineral premix provided per kg of diet: FeSO4•7H2O, 500 mg; CuSO4•5H2O, 80.7 mg; MnSO4•5H2O, 120mg; ZnSO4•7H2O, 500 mg; Na2SeO3, 0.80mg; KI, 0.5 mg.


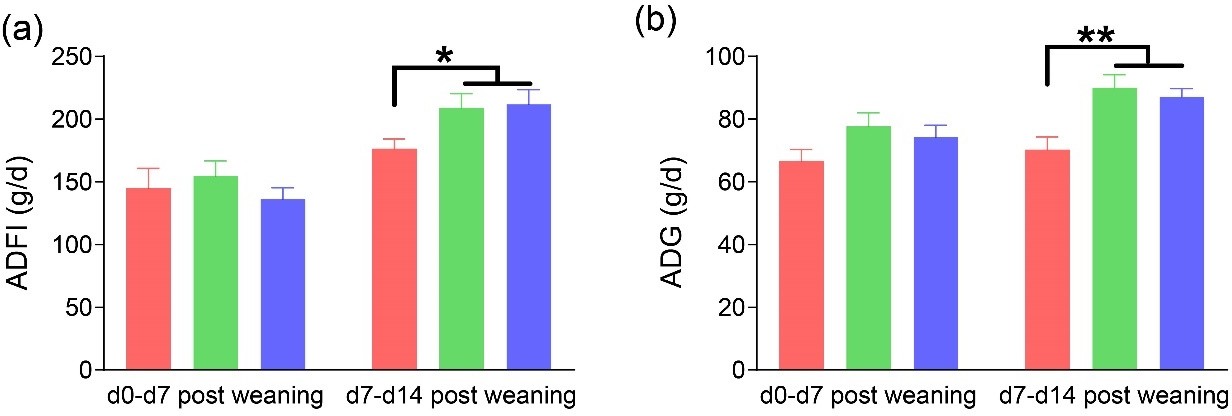
240

FIGURE S1: The effect of dietary quercetin supplementation and FMT on the ADFI and ADG of piglets. (a) ADFI at d0-d7 and d7-d14 post-weaning of piglets.(b) ADG at d0-d7 and d7-d14 post-weaning of piglets. **P* < 0.05, ***P* < 0.01, and ****P* < 0.001.


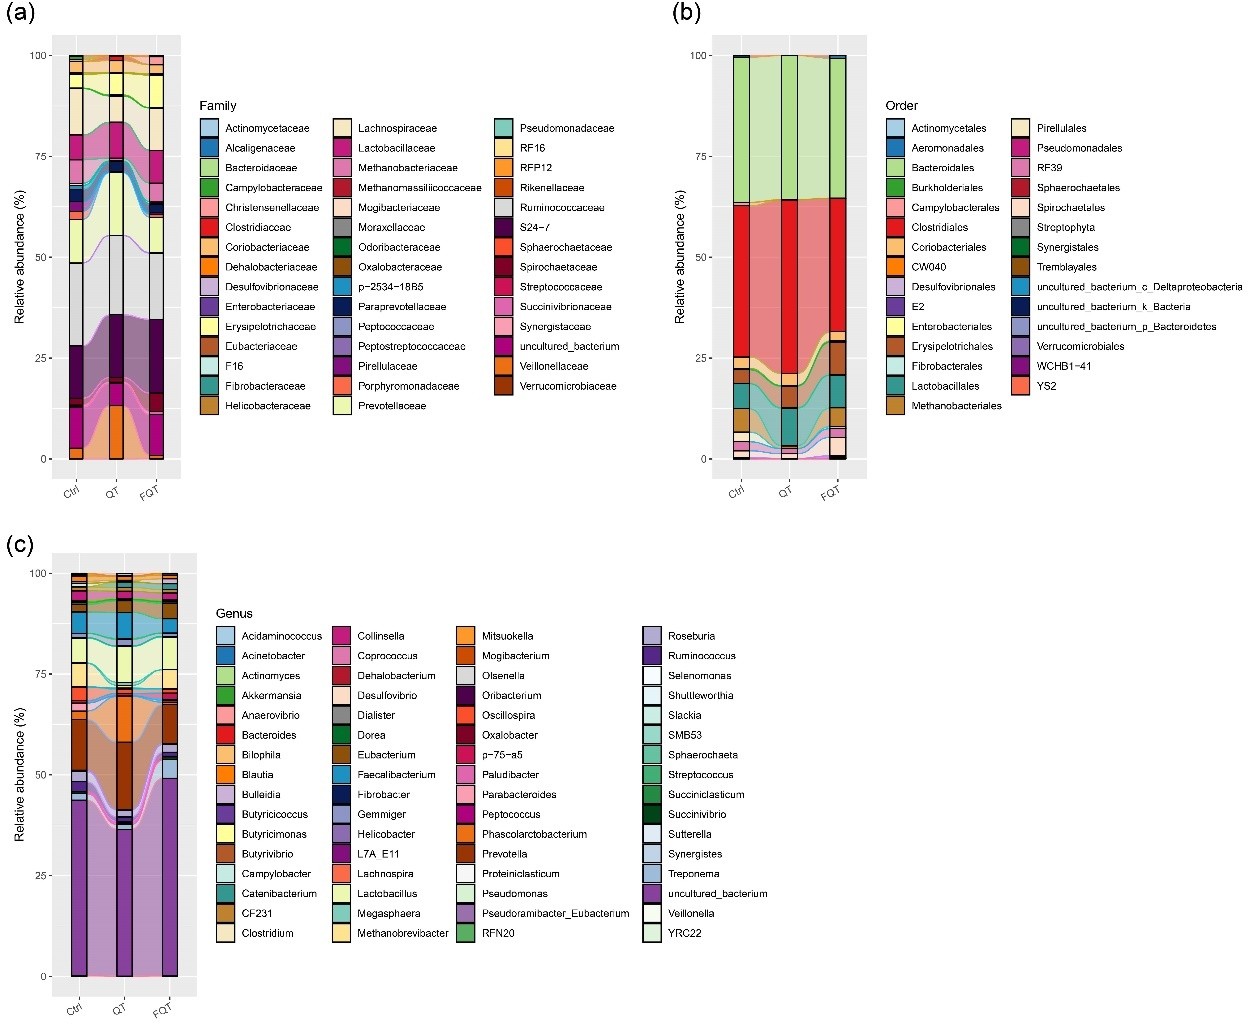


321

FIGURE S2: The effect of dietary quercetin supplementation and FMT on the taxon abundance of gut microbiota in weanling piglets. Linked bar plot of the relative abundance of gut microbiota at levels of Family (a), Order (b), and Genus (c), respectively.
