# Supplementary figures and images for: Dietary Quercetin Supplementation Attenuates Diarrhea and Intestinal Damage by Regulating Gut Microbiota in Weanling Piglets
Source: PubMed Central journal article supplement (PMC8689231; doi:10.1155/2021/6221012), 2021-12-13

# Xu et al. Figure S2

(a)

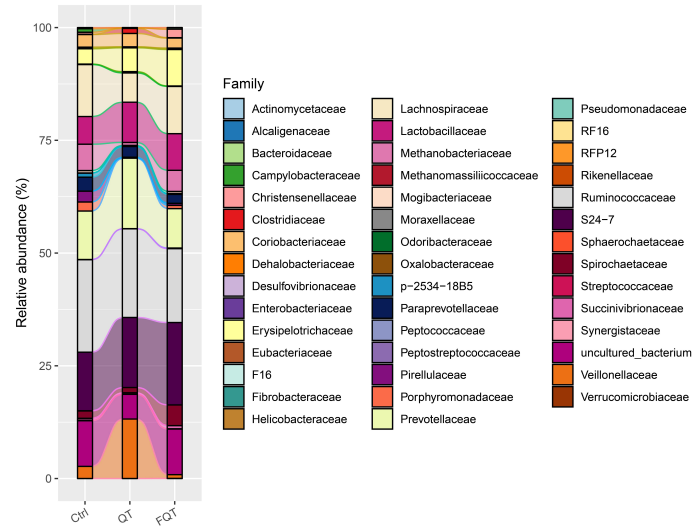

(b)

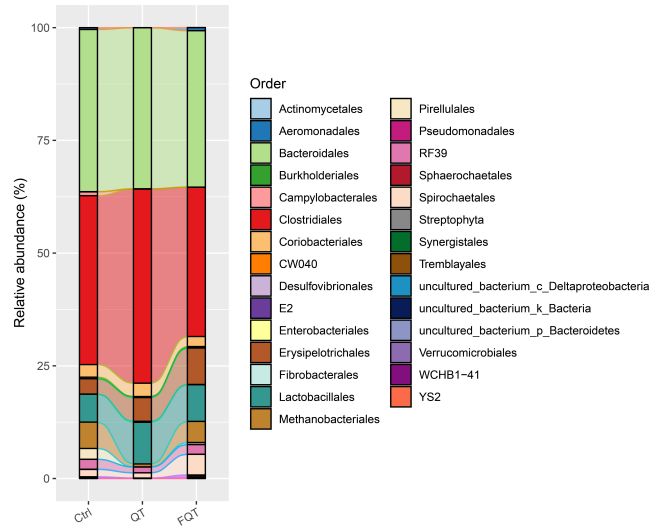

(c)

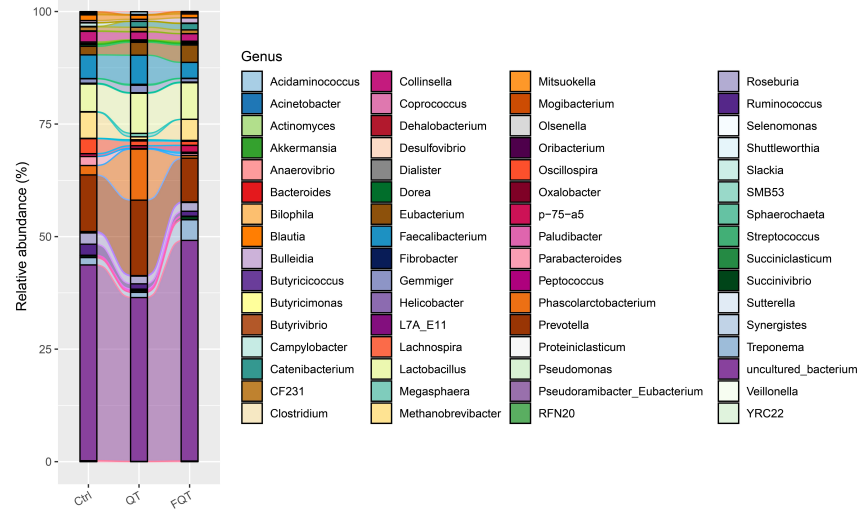

Supplement: 6221012.f2.pdf [file 6221012.f2.pdf]
