# Supplementary figures and images for: [Retracted] Dietary Quercetin Supplementation Attenuates Diarrhea and Intestinal Damage by Regulating Gut Microbiota in Weanling Piglets
Source: Hindawi journal article supplement (doi:10.1155/2021/6221012), 2021-01-01

**Xu et al. Figure S1**

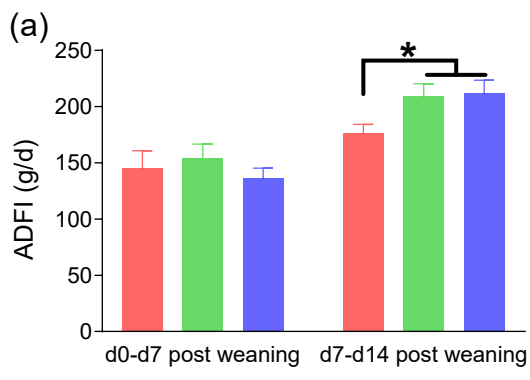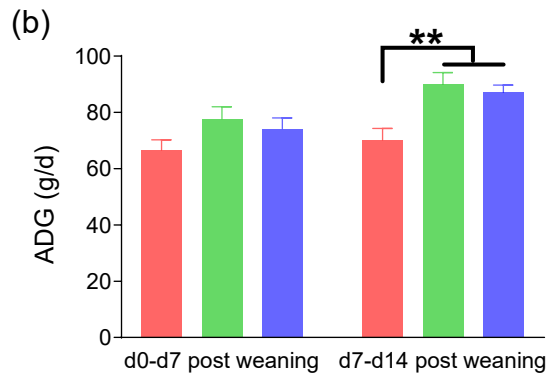

Supplement: f1 [file 6221012.f1.pdf]
